# Supplementary material
Source: PubMed Central journal article supplement (PMC7522919)
Supplement: NIHMS1628598-supplement-1.pdf [file NIHMS1628598-supplement-1.pdf]

## Appendix material for “Development and validation of an automated HIV prediction algorithm to identify candidates for preexposure prophylaxis”

**Appendix Table 1. Electronic health record variables used for development and validation of HIV prediction model.**

| Predictor variables                                                                                                                                                                                                                                                                                |                                                |                                 |
|----------------------------------------------------------------------------------------------------------------------------------------------------------------------------------------------------------------------------------------------------------------------------------------------------|------------------------------------------------|---------------------------------|
| <b>Demographics</b>                                                                                                                                                                                                                                                                                |                                                |                                 |
| Age                                                                                                                                                                                                                                                                                                |                                                |                                 |
| Sex or gender <sup>a</sup>                                                                                                                                                                                                                                                                         |                                                |                                 |
| Race/ethnicity <sup>a,b</sup>                                                                                                                                                                                                                                                                      |                                                |                                 |
| Primary language <sup>a,b</sup>                                                                                                                                                                                                                                                                    |                                                |                                 |
| Number of years of electronic health records data recorded <sup>b</sup>                                                                                                                                                                                                                            |                                                |                                 |
| <b>Clinical encounters</b>                                                                                                                                                                                                                                                                         |                                                |                                 |
| Number of clinical encounters                                                                                                                                                                                                                                                                      |                                                |                                 |
| Number of clinical encounters in the prior year                                                                                                                                                                                                                                                    |                                                |                                 |
| Number of clinical encounters in the prior 2 years                                                                                                                                                                                                                                                 |                                                |                                 |
| <b>Prescriptions</b>                                                                                                                                                                                                                                                                               |                                                |                                 |
| Ceftriaxone injection 125 mg or 250 mg intravenous or intramuscular by year                                                                                                                                                                                                                        |                                                |                                 |
| Methadone by year                                                                                                                                                                                                                                                                                  |                                                |                                 |
| Buprenorphine plus naloxone prescription by year <sup>a,b</sup>                                                                                                                                                                                                                                    |                                                |                                 |
| Sildenafil, tadalafil, or vardenafil prescription by year                                                                                                                                                                                                                                          |                                                |                                 |
| Penicillin G benzathine 2.4 million units injection by year <sup>b</sup>                                                                                                                                                                                                                           |                                                |                                 |
| Azithromycin 1 g orally by year                                                                                                                                                                                                                                                                    |                                                |                                 |
| Tenofovir disoproxil fumarate/emtricitabine prescription for use as PrEP, defined as $\geq 2$ prescriptions written $\geq 2$ months apart during years without meeting case-detection criteria for HIV-infection <sup>c</sup> or chronic hepatitis B infection <sup>d</sup> , by year <sup>c</sup> |                                                |                                 |
| <b>Diagnoses</b>                                                                                                                                                                                                                                                                                   |                                                |                                 |
| Abnormal anal cytology, anal dysplasia, or anal carcinoma in situ                                                                                                                                                                                                                                  | 796·7x, 569·44, 230·5, 230·6                   | D01·3                           |
| Alcohol dependence                                                                                                                                                                                                                                                                                 | 305·00, 305·01, 305·02, 303·90, 303·91, 303·92 | F10·2                           |
| Amphetamine dependence                                                                                                                                                                                                                                                                             | 304·4x                                         | F15·x                           |
| Anal syphilis                                                                                                                                                                                                                                                                                      | 091·1                                          | A51·1                           |
| Anogenital condyloma                                                                                                                                                                                                                                                                               | 078·11                                         | A63·0                           |
| Anorectal ulcer                                                                                                                                                                                                                                                                                    | 569·41                                         | K62·6                           |
| Anorexia nervosa                                                                                                                                                                                                                                                                                   | 307·1                                          | F50·0                           |
| Bulimia nervosa <sup>a</sup>                                                                                                                                                                                                                                                                       | 307·51                                         | F50·2                           |
| Chancroid                                                                                                                                                                                                                                                                                          | 099·0                                          | A57                             |
| Chlamydial infection of anus and rectum                                                                                                                                                                                                                                                            | 099·52                                         | A56·3                           |
| Chlamydial infection of pharynx                                                                                                                                                                                                                                                                    | 099·51                                         | A56·4                           |
| Cocaine dependence                                                                                                                                                                                                                                                                                 | 304·2x                                         | F14·x                           |
| Counseling for child sexual abuse                                                                                                                                                                                                                                                                  | V61·21                                         | Z61·4, Z61·5                    |
| Contact with or exposure to venereal disease <sup>a,b</sup>                                                                                                                                                                                                                                        | V01·6                                          | Z20·2, Z20·6                    |
| Gender identity disorders <sup>a</sup>                                                                                                                                                                                                                                                             | 302·0                                          | F64·8, F64·9, F66·0             |
| Eating disorder NOS                                                                                                                                                                                                                                                                                | 307·50                                         | F50·9                           |
| Foreign body in anus                                                                                                                                                                                                                                                                               | 937                                            | T18·5                           |
| Genital herpes                                                                                                                                                                                                                                                                                     | 054·1x                                         | A60·0                           |
| Gonococcal infection of anus and rectum                                                                                                                                                                                                                                                            | 098·7                                          | A54·6                           |
| Gonococcal pharyngitis                                                                                                                                                                                                                                                                             | 098·6                                          | A54·5                           |
| Granuloma inguinale                                                                                                                                                                                                                                                                                | 099·2                                          | A58                             |
| Herpes simplex with complications                                                                                                                                                                                                                                                                  | 054·8, 054·9, 054·79                           | A60·1, A60·9                    |
| High risk sexual behavior <sup>a</sup>                                                                                                                                                                                                                                                             | V69·2                                          | Z72·5                           |
| HIV infection                                                                                                                                                                                                                                                                                      | 042·1                                          | B20·x to B24·x                  |
| HIV counseling <sup>a,b</sup>                                                                                                                                                                                                                                                                      | V65·44                                         | Z71·7                           |
| Lymphoma granuloma venereum                                                                                                                                                                                                                                                                        | 099·1                                          | A55                             |
| Nongonococcal urethritis <sup>a</sup>                                                                                                                                                                                                                                                              | 099·4x                                         | N34·1                           |
| Opioid dependence                                                                                                                                                                                                                                                                                  | 304·0x                                         | F11·x                           |
| Pelvic inflammatory disease                                                                                                                                                                                                                                                                        | 614, 614·1-514·3, 614·5, 614·9                 | N72, N73·0, N73·2, N73·5, N73·9 |
| Sedative, hypnotic, or anxiolytic dependence                                                                                                                                                                                                                                                       | 304·1x                                         | F13·x                           |
| Syphilis of any site or stage except late latent <sup>a,b</sup>                                                                                                                                                                                                                                    | 091·x, 092·x, 093·x, 094·x, 095·x, 097·9       | A51·x, A52·0, A52·7             |
| Trans-sexualism                                                                                                                                                                                                                                                                                    | 302·50, 302·51, 302·52, 302·53                 | F64·0, F64·1                    |
| Unspecified drug dependence                                                                                                                                                                                                                                                                        | 304·9x                                         | F19·x                           |
| Unspecified sexually transmitted disease                                                                                                                                                                                                                                                           |                                                | A63·x, A64                      |

---

**Predictor variables**

---

**Laboratory tests and results**

Number of Chlamydia tests<sup>b</sup>  
Number of Chlamydia tests in the prior year  
Number of Chlamydia tests in the prior 2 years<sup>a</sup>  
Number of positive Chlamydia tests  
Number of positive Chlamydia tests in the prior year  
Number of positive Chlamydia tests in the prior 2 years  
Number of rectal site Chlamydia tests  
Number of rectal site Chlamydia tests in the prior year  
Number of rectal site Chlamydia tests in the prior 2 years  
Number of rectal site positive Chlamydia tests  
Number of rectal site positive Chlamydia tests in the prior year  
Number of rectal site positive Chlamydia tests in the prior 2 years  
Number of oropharyngeal site Chlamydia tests  
Number of oropharyngeal site Chlamydia tests in the prior year  
Number of oropharyngeal site Chlamydia tests in the prior 2 years  
Number of positive oropharyngeal site Chlamydia tests  
Number of positive oropharyngeal site Chlamydia tests in the prior year  
Number of positive oropharyngeal site Chlamydia tests in the prior 2 years  
Serological testing for lymphogranuloma venereum  
Number of Gonorrhea tests  
Number of Gonorrhea tests in the prior year  
Number of Gonorrhea tests in the prior 2 years<sup>a</sup>  
Number of positive gonorrhea tests<sup>a</sup>  
Number of positive gonorrhea tests in the prior year  
Number of positive gonorrhea tests in the prior 2 years<sup>b</sup>  
Number of rectal site gonorrhea tests  
Number of rectal site gonorrhea tests in the prior year  
Number of rectal site gonorrhea tests in the prior 2 years  
Number of rectal site positive gonorrhea tests  
Number of rectal site positive gonorrhea tests in the prior year  
Number of rectal site positive gonorrhea tests in the prior 2 years  
Number of oropharyngeal site gonorrhea tests  
Number of oropharyngeal site gonorrhea tests in the prior year  
Number of oropharyngeal site gonorrhea tests in the prior 2 years  
Number of positive oropharyngeal site gonorrhea tests  
Number of positive oropharyngeal site gonorrhea tests in the prior year  
Number of positive oropharyngeal site gonorrhea tests in the prior 2 years  
Number of Syphilis tests  
Number of Syphilis tests in the prior year  
Number of Syphilis tests in the prior 2 years  
Anal cytology testing  
Number of hepatitis C virus antibody tests  
Number of hepatitis C virus antibody tests in the prior year<sup>a</sup>  
Number of hepatitis C virus antibody tests in the prior 2 years  
Number of hepatitis C virus RNA tests  
Number of hepatitis C virus RNA tests in the prior year  
Number of hepatitis C virus RNA tests in the prior 2 years  
Positive hepatitis C virus antibody or RNA test  
Year of first positive hepatitis C virus antibody test  
Year of first positive hepatitis C virus RNA test  
Number of hepatitis B virus surface antigen tests in the prior year  
Number of hepatitis B virus surface antigen tests in the prior 2 years  
Number of hepatitis B virus surface antigen tests, ever  
Number of hepatitis B virus DNA tests in the prior year  
Number of hepatitis B virus DNA tests in the prior 2 years  
Number of hepatitis B virus DNA tests, ever  
Reactive hepatitis B surface antigen or detectable hepatitis B DNA  
Year of first positive for hepatitis B virus infection  
Number of HIV tests<sup>b</sup>  
Number of HIV tests in the prior year  
Number of HIV tests in the prior 2 years<sup>a,b</sup>  
Number of HIV ELISA tests<sup>b</sup>  
Number of HIV ELISA tests in the prior year  
Number of HIV ELISA tests in the prior 2 years  
Number of HIV Western Blot tests  
Number of HIV Western Blot tests in the prior year  
Number of HIV Western Blot tests in the prior 2 years  
Number of HIV RNA tests<sup>a</sup>

---

---

**Predictor variables**

---

Number of HIV RNA tests in the prior year<sup>b</sup>  
Number of HIV RNA tests in the prior 2 years  
Testing for acute HIV, defined as HIV RNA testing and not meeting case-detection criteria for HIV infection<sup>b,c</sup>  
Testing for acute HIV, defined as HIV RNA testing and not meeting case-detection criteria for HIV infection<sup>c</sup>, in the prior 2 years<sup>b</sup>

**Combinations of Variables**

Positive case-detection criteria for HIV infection<sup>c</sup>  
First year of meeting positive case-detection criteria for HIV infection<sup>c</sup>  
Positive case-detection criteria for acute hepatitis B infection<sup>d</sup>  
First year of meeting positive case-detection criteria for acute hepatitis B infection<sup>d</sup>  
Positive case-detection criteria for acute hepatitis C infection<sup>f</sup>  
Positive case-detection criteria for Syphilis<sup>g</sup>  
Positive case-detection criteria for Syphilis<sup>g</sup> in the prior year  
Positive case-detection criteria for Syphilis<sup>g</sup> in the prior 2 years  
Female sex or gender with any variables indicating testing, diagnosis, or treatment for gonorrhea, chlamydia or syphilis, or with diagnosis of unspecified sexually transmitted disease or pelvic inflammatory disease<sup>a</sup>  
Trans-sexualism or gender identity disorders  
Opioid dependence or Buprenorphine plus naloxone prescription or methadone prescription or amphetamine dependence or cocaine dependence

---

NOS, not otherwise specified; ICD-9 and ICD-10, International Classification of Diseases, Ninth and Tenth Revisions, respectively; RNA, ribonucleic acid; ELISA, enzyme-linked immunosorbent assay.

<sup>a</sup>Predictors of incident HIV infection pre-selected by clinical experts.

<sup>b</sup>Predictors of incident HIV infection included in the final LASSO model.

<sup>c</sup>HIV infection defined as any of the following: 1) a positive Western Blot, Multispot, or Geenius test result; 2) a positive HIV Antigen/Antibody test AND a positive HIV ELISA; 3) HIV RNA Viral Load over 200 copies/mL; 4) HIV Qualitative PCR; 5) 2 or more ICD codes for HIV and a history of prescription for 3 or more HIV medications, ever; 6) HIV on the medical problem list and a history of prescription for 3 or more HIV medications, ever; 7) concurrent prescriptions for 3 or more different antiretroviral medications for at least 1 month.

<sup>d</sup>Acute hepatitis B infection defined as any of the following: 1) One of the following: a) diagnosis code for jaundice (not of newborn), b) Alanine aminotransferase (ALT) > than 5 times the upper limit of normal, or c) aspartate aminotransferase (AST) > than 5 times the upper limit of normal, AND IgM antibody to Hepatitis B core Antigen “reactive” within a 14 day period; 2) One of the following: a) diagnosis code for jaundice (not of newborn), b) ALT > than 5 times the upper limit of normal, or c) AST > than 5 times the upper limit of normal, AND one of the following: a) total bilirubin > 1.5 or b) calculated bilirubin > 1.5, AND Hepatitis B Surface Antigen within a 21-day period, AND no prior positive result for hepatitis B Surface Antigen or hepatitis B viral DNA, AND no codes for diagnosis for chronic hepatitis B in the past; 3) One of the following: a) diagnosis code for jaundice (not of newborn), b) ALT > than 5 times the upper limit of normal, or c) AST > than 5 times the upper limit of normal, AND one of the following: a) total bilirubin > 1.5 or b) calculated bilirubin > 1.5, AND hepatitis B viral DNA within a 21-day period, AND no prior positive result for hepatitis B Surface Antigen or hepatitis viral DNA, AND no codes for diagnosis of chronic hepatitis B in the past; 4) hepatitis B Surface Antigen “reactive” with record of hepatitis B Surface Antigen “non-reactive” within the prior 12 months, AND no prior positive result for hepatitis B Surface Antigen or hepatitis viral DNA, AND no codes for diagnosis of chronic hepatitis B in the past.

<sup>e</sup>Prescriptions for PrEP were not included as a predictor variable in our model. Data on PrEP use was collected so we could examine model performance at identifying patients who were prescribed PrEP by clinicians.

<sup>f</sup>Acute hepatitis C infection defined as any of the following: 1) any one of the following: a) diagnosis code for jaundice, b) ALT > 200, or c) total bilirubin > 1.5, AND reactive hepatitis C ELISA, AND all of the following if completed: a) hepatitis C signal cutoff ratio  $\geq 3.8$ , b) positive hepatitis C recombinant immunoblot assay (RIBA), and c) detectable hepatitis C RNA, all the above criteria within a 28-day period, AND no prior positive: a) hepatitis C ELISA, b) hepatitis C RIBA, or c) detectable hepatitis C RNA, AND no prior diagnosis code for chronic hepatitis C; 2) any one of the following: a) diagnosis code for jaundice, b) ALT > 200, or c) total bilirubin > 1.5, AND

detectable hepatitis C RNA and all of the following if done: a) hepatitis C signal cutoff ratio  $\geq 3.8$ , and b) hepatitis C RIBA, all of the above criteria within a 28-day period, AND no prior positive: a) hepatitis C ELISA, b) hepatitis C RIBA, or c) detectable hepatitis C RNA, AND no prior diagnosis code for chronic hepatitis C; 3) detectable hepatitis C RNA AND in the prior 12 months a recorded negative: a) hepatitis C ELISA, or b) detectable hepatitis C RNA, AND no prior positive: a) hepatitis C ELISA, b) hepatitis C RIBA, or c) detectable hepatitis C RNA, AND no prior diagnosis code for chronic hepatitis; 4) reactive hepatitis C ELISA AND in the prior 12 months a recorded negative: a) hepatitis C ELISA or b) hepatitis C RNA, AND no prior positive: a) hepatitis C ELISA, b) hepatitis C RIBA, or c) detectable hepatitis C RNA, AND no prior diagnosis code for chronic hepatitis.

<sup>§</sup>Active syphilis defined as meeting any of the following three criteria: 1) (Diagnosis code for syphilis or positive Treponema pallidum IgM test) and an order or prescription for at least one of the following antibiotics within a 14-day period: a) penicillin G; b) doxycycline for > 7 day duration, or c) ceftriaxone dosed at  $\geq 1$  gram; 2) Serum reactive plasma regain (RPR) or Venereal Disease Research Laboratory (VDRL) test value greater than or equal to 1:8 and any of the following: a) Treponema pallidum particle agglutination (TPPA) test with result "reactive" ever in the past and up to 1 month following the positive RPR or VDRL; b). fluorescent treponemal antibody absorption (FTA-ABS) test with result "reactive" ever in the past and up to 1 month following the positive RPR or VDRL; or c) Treponema pallidum IgG test (TP-IGG) test with result "positive" or "reactive" ever in the past and up to 1 month following positive RPR or VDRL; or 3) Positive cerebrospinal fluid test for syphilis, including any of the following: a) VDRL-CSF value "reactive" or  $\geq 1:14$ ; b) TPPA-CSF with result "reactive" or "positive" or equivalent; or c) FTA-ABS-CSF with result "reactive" or "positive" or equivalent.

## Appendix Methods: Algorithm development

We used Super Learning to evaluate 42 candidate algorithms for HIV prediction. Super Learning uses cross-validation to select an optimal combination of predictions from across multiple candidate algorithms or to identify the single best algorithm.<sup>1,2</sup> The candidate algorithms investigated by Super Learner, known as the Super Learner library, included logistic regression models<sup>3</sup> and machine learning algorithms: least absolute shrinkage and selection operator (LASSO),<sup>4</sup> ridge regression,<sup>4</sup> random forest,<sup>5</sup> support vector machine,<sup>6</sup> and neural networks.<sup>7</sup>

Risk prediction algorithms can have better predictive performance when cases and controls are more equally represented in the data, so algorithms were also applied to subsets of data where the ratio of controls to cases was approximately 20:1 or 10:1. Algorithms were also applied to restricted datasets containing a subset of 23 predictors that were pre-selected using clinical judgement, to assess whether inclusion of fewer covariates could decrease overfitting. These 23 pre-selected predictors are denoted in Appendix Table 1. Appendix Table 2 describes the candidate prediction algorithms in the Super Learner library, including numbers of controls per case and whether algorithms used pre-selected predictors or all predictors.

Analyses were run in the R statistical programming environment.<sup>2</sup> The following additional R packages that were used are available online on the Comprehensive R Archive Network (CRAN) website at <http://cran.r-project.org/>: Super Learner v 2.0-21<sup>2</sup>; glmnet v2.0-5<sup>4</sup>; randomForest v4.6-12<sup>5</sup>; e1071 v1.6-7<sup>6</sup>; nnet v7.3-12<sup>7</sup>.

**Appendix Table 2. Candidate prediction algorithms in the Super Learner library.**

| Prediction algorithm   | Controls per case (approximate) |              | Eligible covariates                               | Notes <sup>a</sup> |
|------------------------|---------------------------------|--------------|---------------------------------------------------|--------------------|
|                        | n                               |              |                                                   |                    |
| Logistic regression    | 50                              | All          | Weighted                                          |                    |
|                        | 50                              | Pre-Selected |                                                   |                    |
|                        | 50                              | All          | --                                                |                    |
|                        | 50                              | Pre-selected |                                                   |                    |
|                        | 20                              | All          | Weighted                                          |                    |
|                        | 20                              | Pre-selected |                                                   |                    |
|                        | 20                              | All          | --                                                |                    |
|                        | 20                              | Pre-Selected |                                                   |                    |
|                        | 10                              | All          | Weighted                                          |                    |
|                        | 10                              | Pre-Selected |                                                   |                    |
|                        | 10                              | All          | --                                                |                    |
|                        | 10                              | Pre-Selected |                                                   |                    |
|                        | 50                              | All          | Stepwise backward selection                       |                    |
|                        | 50                              | Pre-Selected |                                                   |                    |
| LASSO                  | 20                              | All          | Deviance loss                                     |                    |
|                        | 20                              | All          | AUC loss                                          |                    |
|                        | 20                              | Pre-Selected | Deviance Loss                                     |                    |
|                        | 20                              | Pre-Selected | AUC loss                                          |                    |
|                        | 10                              | All          | Deviance loss                                     |                    |
|                        | 10                              | All          | AUC loss                                          |                    |
|                        | 10                              | Pre-Selected | Deviance loss                                     |                    |
|                        | 10                              | Pre-Selected | AUC loss                                          |                    |
| Ridge regression       | 20                              | All          | Deviance loss                                     |                    |
|                        | 20                              | All          | AUC loss                                          |                    |
|                        | 20                              | Pre-Selected | Deviance loss                                     |                    |
|                        | 20                              | Pre-Selected | AUC loss                                          |                    |
|                        | 10                              | All          | Deviance loss                                     |                    |
|                        | 10                              | All          | AUC loss                                          |                    |
|                        | 10                              | Pre-Selected | Deviance loss                                     |                    |
|                        | 10                              | Pre-Selected | AUC loss                                          |                    |
| Random forest          | 50                              | All          | 10,000 trees, 1/3 of covariates sampled per split |                    |
|                        | 50                              | Pre-Selected |                                                   |                    |
|                        | 20                              | All          |                                                   |                    |
|                        | 20                              | Pre-Selected |                                                   |                    |
|                        | 10                              | All          |                                                   |                    |
|                        | 10                              | Pre-Selected |                                                   |                    |
| Support vector machine | 50                              | All          | Tuning parameters chosen by cross validation      |                    |
|                        | 50                              | Pre-Selected |                                                   |                    |
| Neural network         | 20                              | Pre-Selected | 10 nodes in 1 hidden layer                        |                    |
|                        | 20                              | Pre-Selected | 5 nodes in 1 hidden layer                         |                    |
|                        | 10                              | Pre-Selected | 10 nodes in 1 hidden layer                        |                    |
|                        | 10                              | Pre-Selected | 5 nodes in 1 hidden layer                         |                    |

LASSO, least absolute shrinkage and selection operator; AUC, area under the receiver-operating curve.

<sup>a</sup>Risk scores were re-scaled to account for undersampling of controls, except for weighted logistic regression algorithms.

**Appendix Table 3. Demographic characteristics of patients with incident HIV infection and PrEP use in the three study cohorts.**

| Characteristic                             | Atrius Health                  |                 |                               |                  | Fenway Health                  |                   |
|--------------------------------------------|--------------------------------|-----------------|-------------------------------|------------------|--------------------------------|-------------------|
|                                            | 2007-2015                      |                 | 2016                          |                  | 2011-2016                      |                   |
|                                            | Incident HIV infection (n=150) | PrEP use (n=90) | Incident HIV infection (n=16) | PrEP use (n=128) | Incident HIV infection (n=423) | PrEP use (n=1813) |
| <b>Age (years),<sup>a</sup> mean (SD)</b>  | 40 (12)                        | 38 (10)         | 34 (12)                       | 38 (11)          | 37 (11)                        | 36 (10)           |
| <b>Male, n (%)</b>                         | 120 (80)                       | 87 (97)         | 15 (94)                       | 128 (100)        | 395 (93)                       | 1764 (97)         |
| <b>Race, n (%)</b>                         |                                |                 |                               |                  |                                |                   |
| White                                      | 55 (37)                        | 66 (73)         | 8 (50)                        | 75 (59)          | 243 (57)                       | 1375 (76)         |
| Black or African-American                  | 51 (34)                        | 6 (7)           | 3 (19)                        | 11 (9)           | 57 (13)                        | 95 (5)            |
| American Indian or Alaska Native           | 0 (0)                          | 0 (0)           | 0 (0)                         | 0 (0)            | 2 (0.5)                        | 3 (0.2)           |
| Asian                                      | 5 (3)                          | 1 (1)           | 1 (6)                         | 10 (8)           | 27 (6)                         | 84 (5)            |
| Native Hawaiian and Other Pacific Islander | 1 (1)                          | 0 (0)           | 0 (0)                         | 0 (0)            | 2 (0.5)                        | 9 (0.5)           |
| Other                                      | 26 (17)                        | 13 (14)         | 3 (19)                        | 21 (16)          | 44 (10)                        | 151 (8)           |
| <b>Hispanic or Latino, n (%)</b>           | 12 (8)                         | 6 (7)           | 1 (6)                         | 11 (9)           | 48 (11)                        | 96 (5)            |

PrEP, preexposure prophylaxis.

<sup>a</sup>Age as of the beginning of the study period or, for those patients who had not yet established care as of this date, as of the date of their first documented electronic health records data element.

**Appendix Table 4. Performance of LASSO algorithm for detecting incident HIV infection in prospective validation and external validation cohorts.<sup>a</sup>**

| Percentile of HIV risk score in development cohort used to define test positivity | Risk score (out of 100,000) | Atrius Health 2016 |                 |                               |                               | Fenway Health   |                 |                               |                               |
|-----------------------------------------------------------------------------------|-----------------------------|--------------------|-----------------|-------------------------------|-------------------------------|-----------------|-----------------|-------------------------------|-------------------------------|
|                                                                                   |                             | Sensitivity (%)    | Specificity (%) | Positive predictive value (%) | Negative predictive value (%) | Sensitivity (%) | Specificity (%) | Positive predictive value (%) | Negative predictive value (%) |
| 10%                                                                               | 0                           | 100                | 54.2            | 0                             | 100                           | 100             | 0               | 1.5                           | 100                           |
| 20%                                                                               | 0                           | 100                | 54.2            | 0                             | 100                           | 100             | 0               | 1.5                           | 100                           |
| 30%                                                                               | 0                           | 100                | 54.2            | 0                             | 100                           | 100             | 0               | 1.5                           | 100                           |
| 40%                                                                               | 0                           | 100                | 54.2            | 0                             | 100                           | 100             | 0               | 1.5                           | 100                           |
| 50%                                                                               | 0                           | 100                | 54.2            | 0                             | 100                           | 100             | 0               | 1.5                           | 100                           |
| 60%                                                                               | 0                           | 100                | 54.2            | 0                             | 100                           | 100             | 0               | 1.5                           | 100                           |
| 70%                                                                               | 1                           | 100                | 67.6            | 0                             | 100                           | 100             | 2.0             | 1.5                           | 100                           |
| 80%                                                                               | 2                           | 100                | 75.8            | 0                             | 100                           | 98.1            | 26.8            | 1.9                           | 99.9                          |
| 90%                                                                               | 8                           | 93.8               | 91.0            | 0                             | 100                           | 91.3            | 44.2            | 2.4                           | 99.7                          |
| 91%                                                                               | 9                           | 93.8               | 91.1            | 0                             | 100                           | 91.0            | 45.3            | 2.4                           | 99.7                          |
| 92%                                                                               | 10                          | 81.2               | 92.4            | 0                             | 100                           | 87.5            | 48.2            | 2.4                           | 99.6                          |
| 93%                                                                               | 11                          | 81.2               | 93.7            | 0                             | 100                           | 85.6            | 51.2            | 2.5                           | 99.6                          |
| 94%                                                                               | 12                          | 75.0               | 94.7            | 0                             | 100                           | 83.0            | 54.6            | 2.6                           | 99.5                          |
| 95%                                                                               | 13                          | 62.5               | 95.4            | 0                             | 100                           | 80.4            | 59.1            | 2.8                           | 99.5                          |
| 96%                                                                               | 15                          | 50.0               | 96.5            | 0                             | 100                           | 53.2            | 75.7            | 3.1                           | 99.1                          |
| 97%                                                                               | 18                          | 50.0               | 97.2            | 0.1                           | 100                           | 48.9            | 79.1            | 3.3                           | 99.1                          |
| 98%                                                                               | 25                          | 37.5               | 98.2            | 0.1                           | 100                           | 46.3            | 84.7            | 4.3                           | 99.1                          |
| 99%                                                                               | 32                          | 25.0               | 99.0            | 0.1                           | 100                           | 31.0            | 92.0            | 5.4                           | 98.9                          |

LASSO, least absolute shrinkage and selection operator.

<sup>a</sup>Includes patients at risk for acquiring HIV who were not on or initiating PrEP and not previously diagnosed with HIV (n= 536,400 at Atrius in 2016, and n = 29,125 unique patients seen at Fenway during 2011-2016).



## Appendix References

1. van der Laan MJ, Polley EC, Hubbard AE. Super learner. *Stat Appl Genet Mol Biol* 2007; 6: Article 25.
2. Polley E, LeDell E, van Der Laan M. SuperLearner: Super Learner Prediction. R package version 2.0-19. 2018. Accessed at: <https://CRAN.R-project.org/package=SuperLearner> on March 22, 2019.
3. R Development Core Team. R: A Language and Environment for Statistical Computing. Vienna, Austria, 2016. Accessed at: <https://www.R-project.org> on January 18, 2019.
4. Friedman J, Hastie T, Tibshirani R. Regularization Paths for Generalized Linear Models via Coordinate Descent. *J Stat Softw* 2010; 33(1): 1-22.
5. Liaw A, Wiener M. Classification and Regression by randomForest. *R News*. 2002; 2(3):18–22. Accessed at: <https://cran.r-project.org/doc/Rnews/> on January 18, 2019.
6. Meyer D, Dimitriadou E, Hornik K, Weingessel A, Leisch F. e1071: Misc Functions of the Department of Statistics, Probability Theory Group (Formerly: E1071), TU Wien. 2017. R package e1071 version 1.6-8. Accessed at: <http://CRAN.R-project.org/package=e1071> on March 22, 2019.
7. Venables WN, Ripley BD. *Modern applied statistics with S*. 4th ed. New York: Springer; 2002.
